# Supplementary material for: Development of a copper metabolism-related gene signature in lung adenocarcinoma
Source: Front Immunol. 2022 Nov 29;13:1040668. doi: 10.3389/fimmu.2022.1040668 (PMC9744782; doi:10.3389/fimmu.2022.1040668)
Supplement: Supplementary Table 1 — Copper metabolism-related genes. [file Table_1.xlsx]

## Sheet: Sheet1
Copper metabolism-related genes
ABCB6
ANKRD9
SLC31A1
SLC31A2
PRND
CCDC22
APP
ARF1
MT2A
ATOX1
ATP7A
ATP7B
PRNP
SCO1
COX19
SCO2
CYP1A1
DAXX
BACE1
AOC1
MT1DP
HSF1
AQP1
AQP2
MT1A
MT1B
MT1E
MT1F
MT1G
MT1H
MT1M
MT1X
MT3
NFE2L2
MT1HL1
SNCA
MAP1LC3A
MT4
BECN1
COMMD1
XIAP
CUTC
STEAP2
STEAP3
STEAP4
SLC11A2
COX17
CP
FKBP4
HEPHL1
MMGT1
HEPH
PARK7
AANAT
IL1A
LCAT
LOXL2
MT-CO1
PAM
ATP5F1D
SOD1
SOD3
SORD
TFRC
CDK1
MOXD2P
MTCO2P12
COX11
LACC1
DBH
DCT
ALB
F5
F8
OR5AR1
ADNP
ATP13A2
MOXD1
GPC1
ANG
SUMF1
AOC2
SNAI3
APOA4
COA6
LOX
LOXL1
MT-CO2
ACR
P2RX4
CUTA
HAMP
S100A5
S100A12
S100A13
SNCB
SNCG
TP53
TYR
LOXL4
LOXL3
AOC3
RNF7
CCS
AP1S1
AP1B1
TMPRSS6
SPATA5
COG2
ATP6V0A2
ATP6AP1
ADAM10
AKT1
MTF2
FOXO1
FOXO3
STEAP1
GSK3B
APC
JUN
MAPT
MDM2
MT1JP
MT1L
MTF1
PIK3CA
XAF1
PTEN
CCND1
SP1
ADAM17
CASP3
ADAM9
